# Supplementary material for: Glutamate Dehydrogenase Is Required by Mycobacterium bovis BCG for Resistance to Cellular Stress
Source: PubMed Central journal article supplement (PMC4732601; doi:10.1371/journal.pone.0147706), 2016-01-29
Supplement: pone.0147706.s004.pdf [file pone.0147706.s004.pdf]

**Table S1: Expression of GDH in wt-BCG,  $\Delta gdh$  mutant and  $\Delta gdh$  complement cultured in 7H9 to mid-logarithmic growth-phase (OD<sub>600</sub> = 0.5-0.7).**

| Strain                                                | Expression      |
|-------------------------------------------------------|-----------------|
| <b><u>mU/mg protein</u></b>                           |                 |
| wt-BCG                                                | 40.82 ± 6.26    |
| $\Delta gdh$                                          | 0.39 ± 0.40 *** |
| $\Delta gdh$ complement                               | 1.06 ± 0.53 *** |
| <b><u>16S-normalized expression of <i>gdh</i></u></b> |                 |
| wt-BCG                                                | 2.95 ± 0.72     |
| $\Delta gdh$                                          | 0.00 ± 0.00 na  |
| $\Delta gdh$ complement                               | 0.50 ± 0.09 *   |

All procedures followed for GDH specific activity determination and quantification of relative *gdh* mRNA levels are described in the supplementary materials and methods file.

Mean specific activity (mU/mg protein) ± standard deviation was calculated from triplicate culture data.

Mean specific activity was compared between the  $\Delta gdh$  mutant or  $\Delta gdh$  complement and wt-BCG and differences were analysed by one way ANOVA with Bonferroni post-testing.

\*\*\* - significantly different from wt-BCG  $p < 0.001$

Mean 16S-normalized expression of *gdh* ± standard error was calculated from three independent experiments carried out in duplicate.

Mean 16S-normalized expression of *gdh* was compared between the  $\Delta gdh$  complement strain and wt-BCG and the difference analysed by unpaired two-tailed t-test with Welch's correction.

\* - significantly different from wt-BCG  $p < 0.05$ , na – not applicable
