# Supplementary material for: Glutamate Dehydrogenase Is Required by Mycobacterium bovis BCG for Resistance to Cellular Stress
Source: PubMed Central journal article supplement (PMC4732601; doi:10.1371/journal.pone.0147706), 2016-01-29
Supplement: pone.0147706.s005.pdf [file pone.0147706.s005.pdf]

**Table S2. *Mycobacterium bovis* BCG strains used in this study.**

| <b>Strain:</b>                   | <b>Description:</b>                                                                                                                                                                  | <b>Source/reference:</b> |
|----------------------------------|--------------------------------------------------------------------------------------------------------------------------------------------------------------------------------------|--------------------------|
| wt-BCG                           | <i>M. bovis</i> BCG str. Pasteur 1743P2                                                                                                                                              | Laboratory collection    |
| $\Delta$ <i>gltBD</i>            | wt-BCG pJV53 background in which the <i>gltBD</i> operon was substituted with a hygromycin cassette, <i>hyg<sup>R</sup></i> , <i>kan<sup>R</sup></i>                                 | [1]                      |
| $\Delta$ <i>gltBD</i> complement | Genetically complemented strain of $\Delta$ <i>gltBD</i> , <i>attB</i> ::pGC <i>gltBD</i> , carries pJV53, <i>hyg<sup>R</sup></i> , <i>kan<sup>R</sup></i> , <i>gent<sup>R</sup></i> | [1]                      |
| $\Delta$ <i>gdh</i>              | wt-BCG background in which the <i>Nrul</i> fragment spanning the GDH domain within <i>gdh</i> was deleted.                                                                           | [1]                      |
| $\Delta$ <i>gdh</i> complement   | Genetically complemented strain of $\Delta$ <i>gdh</i> , <i>attB</i> ::pGC <i>gdh</i> , <i>gent<sup>R</sup></i>                                                                      | [1]                      |

---

1. Viljoen AJ, Kirsten CJ, Baker B, van Helden PD, Wiid IJF. The Role of Glutamine Oxoglutarate Aminotransferase and Glutamate Dehydrogenase in Nitrogen Metabolism in *Mycobacterium bovis* BCG. PLoS ONE. 2013;8. doi:10.1371/journal.pone.0084452
